# Supplementary material
Source: publisher site journal article supplement (https://static.cambridge.org/content/id/urn:cambridge.org:id:article:S2040174419000540/resource/name/S2040174419000540supp001.docx)
Supplement: Supplementary file 1 [file S2040174419000540supp001.docx]

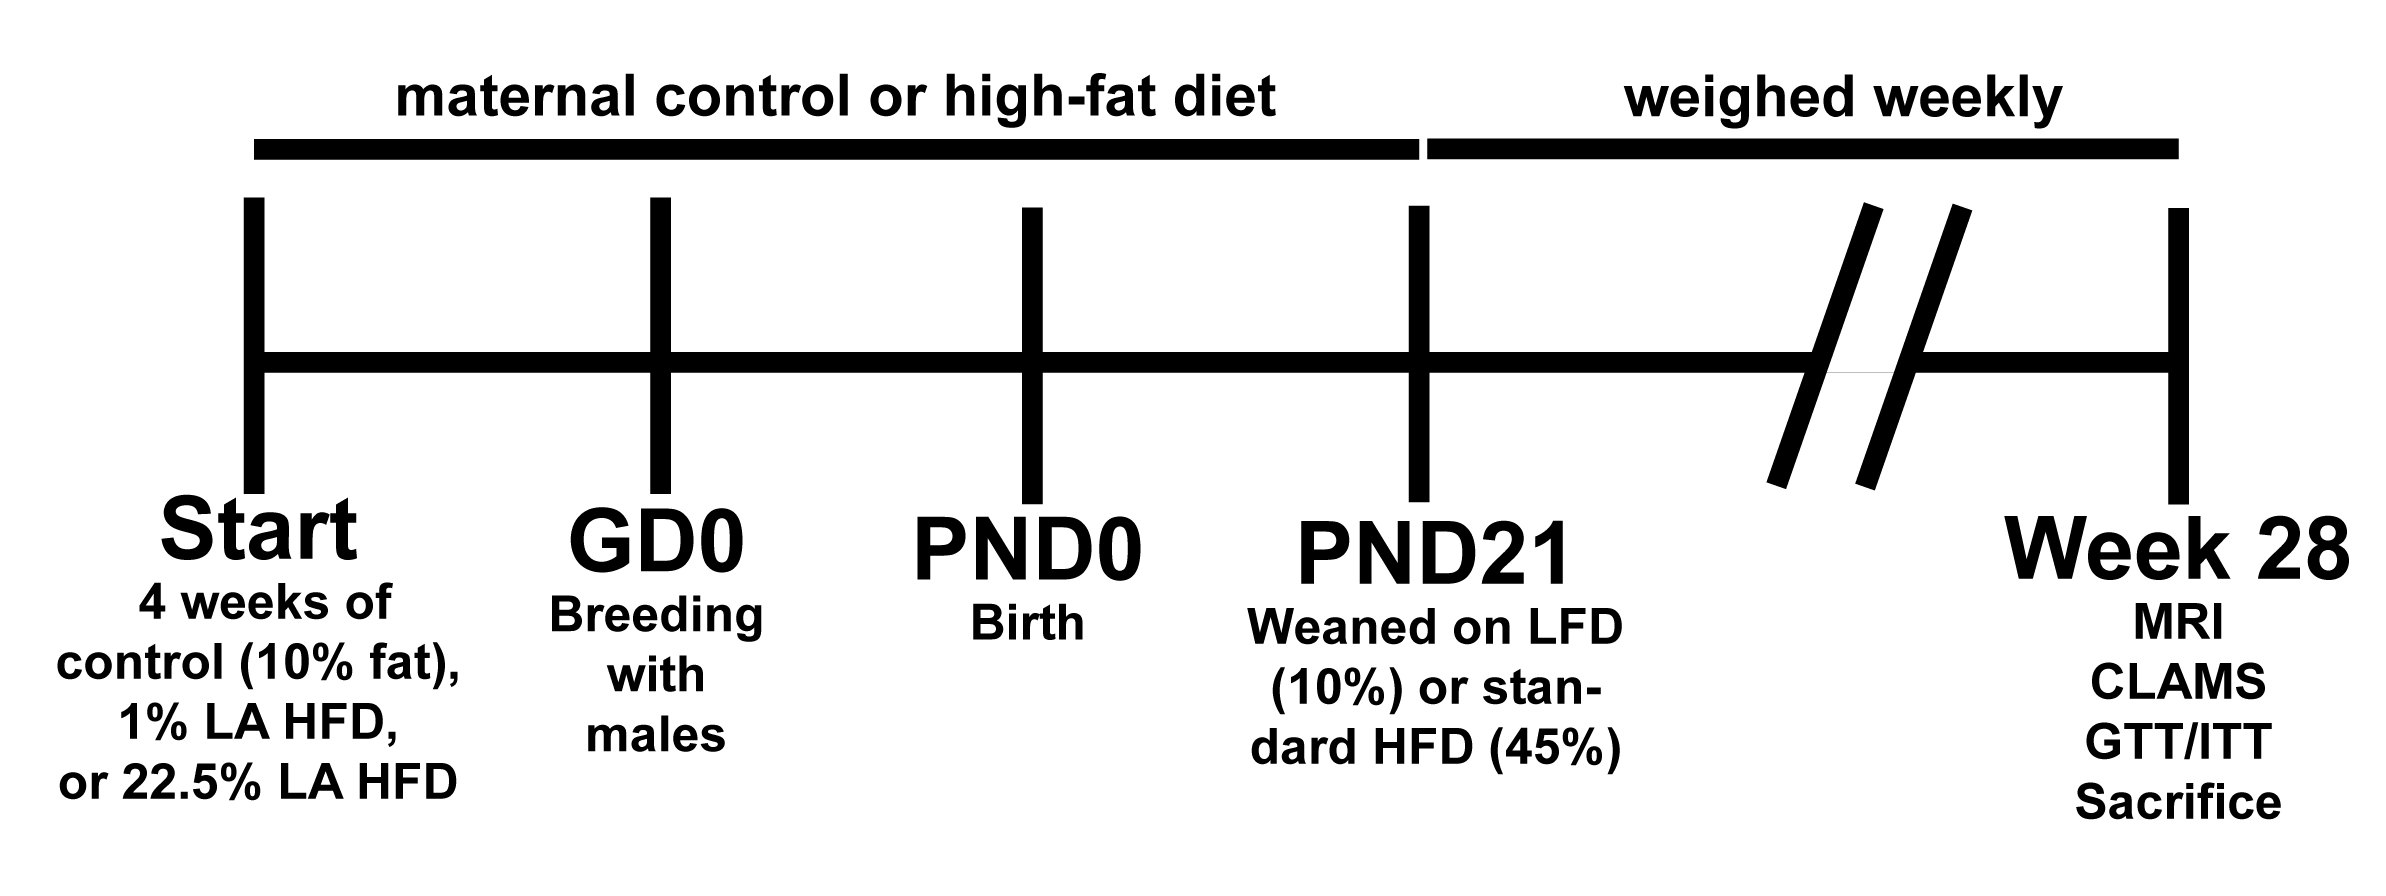


**Supplementary Figure 1.** A timeline of the experimental design described in the methods. Abbreviations: CLAMS, Comprehensive Lab Animal Monitoring System; GD, gestational day; GTT; glucose tolerance test; HFD, high-fat diet; ITT, insulin tolerance test; LA, linoleic acid; LFD, low-fat diet; MRI, body composition; PND, postnatal day.
